# Supplementary material for: Nuances of Responses to Two Sources of Grapevine Leafroll Disease on Pinot Noir Grown in the Field for 17 Years
Source: MDPI journal article supplement (doi:10.3390/v14061333), 2022-06-18
Supplement: s1 [file s1]

Supplementary Table S1.

**Top:** Results of RT-PCR detection of the 11 viruses detected in this study on individual plants of the three treatments (Symptomless, GLD\_S+ and GLD\_S++) grafted onto the 5BB rootstock. Only eight plants were available for the Symptomless treatment.

**Bottom:** PCR primers and conditions used (and reference)

|                | Closteroviridae |         | Betaflexiviridae |      |        |     | Tymoviridae |      |       |        |       |
|----------------|-----------------|---------|------------------|------|--------|-----|-------------|------|-------|--------|-------|
|                | GLRaV-1         | GLRaV-3 | GVB              | GPGV | GRSPaV | GVT | GRGV        | GfKv | GAMaV | GSyV-1 | GRVfV |
| Healthy 5BB_01 | -               | -       | -                | -    | +      | -   | +           | -    | -     | +      | -     |
| Healthy 5BB_02 | -               | -       | -                | -    | +      | -   | +           | -    | +     | +      | -     |
| Healthy 5BB_03 | -               | -       | -                | -    | +      | -   | +           | -    | -     | +      | -     |
| Healthy 5BB_04 | -               | -       | -                | -    | +      | -   | +           | -    | -     | -      | -     |
| Healthy 5BB_05 | -               | -       | -                | -    | +      | -   | -           | -    | -     | -      | -     |
| Healthy 5BB_07 | -               | -       | -                | -    | +      | -   | +           | -    | -     | +      | -     |
| Healthy 5BB_08 | -               | -       | -                | -    | +      | -   | -           | -    | -     | +      | -     |
| Healthy 5BB_10 | -               | -       | -                | -    | +      | -   | -           | -    | +     | +      | -     |
| GLD_S+ 5BB_01  | +               | -       | -                | +    | +      | -   | +           | +    | -     | -      | +     |
| GLD_S+ 5BB_02  | +               | -       | -                | -    | +      | -   | +           | +    | -     | -      | +     |
| GLD_S+ 5BB_03  | +               | -       | -                | +    | +      | -   | +           | +    | -     | -      | +     |
| GLD_S+ 5BB_04  | +               | -       | -                | -    | +      | -   | +           | +    | -     | -      | +     |
| GLD_S+ 5BB_05  | +               | -       | -                | -    | +      | -   | +           | +    | -     | -      | +     |
| GLD_S+ 5BB_06  | +               | -       | -                | -    | +      | -   | +           | +    | -     | -      | +     |
| GLD_S+ 5BB_07  | +               | -       | -                | -    | +      | -   | +           | +    | -     | -      | +     |
| GLD_S+ 5BB_08  | +               | -       | -                | -    | +      | -   | +           | +    | -     | -      | +     |
| GLD_S+ 5BB_09  | +               | -       | -                | -    | +      | -   | +           | +    | -     | -      | +     |
| GLD_S+ 5BB_10  | +               | -       | -                | -    | +      | -   | +           | -    | -     | -      | +     |
| GLD_S++ 5BB_01 | +               | +       | +                | +    | +      | +   | +           | -    | -     | -      | +     |
| GLD_S++ 5BB_02 | +               | +       | +                | -    | +      | +   | -           | -    | -     | -      | +     |
| GLD_S++ 5BB_03 | +               | +       | +                | -    | +      | +   | +           | -    | -     | -      | +     |
| GLD_S++ 5BB_04 | +               | +       | +                | -    | +      | +   | +           | -    | -     | -      | +     |
| GLD_S++ 5BB_05 | +               | +       | +                | -    | +      | +   | +           | -    | -     | -      | +     |
| GLD_S++ 5BB_06 | +               | +       | +                | +    | +      | +   | -           | -    | -     | -      | +     |
| GLD_S++ 5BB_07 | +               | +       | +                | -    | +      | +   | +           | -    | -     | -      | +     |
| GLD_S++ 5BB_08 | +               | +       | +                | -    | +      | +   | +           | -    | -     | -      | +     |
| GLD_S++ 5BB_09 | +               | +       | +                | -    | +      | +   | +           | -    | -     | -      | +     |
| GLD_S++ 5BB_10 | +               | +       | +                | -    | +      | +   | +           | -    | -     | -      | +     |

| Virus name                                        | Acronym | Primer name | Forward primer sequence (5'-3') | Amplicon size | Annealing temperature | Reference  |
|---------------------------------------------------|---------|-------------|---------------------------------|---------------|-----------------------|------------|
| Grapevine leafroll-associated virus 1             | GLRaV-1 | LQV1-H47    | GTTACGGCCCTTTGTTTATTATGG        | 401bp         | 60°C                  | [58]       |
|                                                   |         | LEVI-C447   | CGACCCCTTTATTGTTTGAGTATG        |               |                       |            |
| Grapevine leafroll-associated virus 3             | GLRaV-3 | LR3POLF1    | ACGTAACGGGGCAGAATATAGT          | 282bp         | 60°C                  | [59]       |
|                                                   |         | LR3POLR1    | TATCAACACCAAGTGCAAGAGTA         |               |                       |            |
| Grapevine virus B                                 | GVB     | GB1         | GTGCTAAGAACGTCTTCACAGC          | 450bp         | 65°C                  | [60]       |
|                                                   |         | GB2         | ATCAGCAAACACGCTTGAACCG          |               |                       |            |
| Grapevine Pinot gris virus                        | GPGV    | GPGV RepF   | TGAGGCATTGATGTTTCCCA            | 525bp         | 60°C                  | [61]       |
|                                                   |         | GPGV RepR   | ACCCAATCAAGCCATGAACCT           |               |                       |            |
| Grapevine rupestris stem pitting-assocaited virus | GRSPaV  | RSP35       | AGRYTTAGRGTRGCTAARGC            | 478bp         | 55°C                  | [62]       |
|                                                   |         | RSP36       | CACATRTCATCVCCYGCAAA            |               |                       |            |
| Grapevine virus T                                 | GVT     | GVT-8123F   | AGGTTYTGCATGTATTACTC            | 312bp         | 54°C                  | This study |
|                                                   |         | GVT-8434R   | TTGTAAGCTGGAGCACCCAT            |               |                       |            |
| Grapevine redglobe virus                          | GRGV    | RG-CF-F1    | GAATTCGCTGTCGGCCACTC            | 453bp         | 60°C                  | [63]       |
|                                                   |         | RG-CF-R1    | AGTGAGAGGAGAGATTCCATC           |               |                       |            |
| Grapevine fleck virus                             | GfKv    | GfKv6445F   | CCGTCTGCTGACCAGCCTG             | 520bp         | 55°C                  | [64]       |
|                                                   |         | GfKv6964R   | CGACGCAGGCGTCATTGCG             |               |                       |            |
| Grapevine asteroid mosaic-associated virus        | GAMaV   | 6165F       | CTCGCGCTCCTCGCATTGTT            | 467bp         | 59°C                  | [65]       |
|                                                   |         | 6631R       | CGTGACGAGGTTGGTCCCA             |               |                       |            |
| Grapevine Syrah virus 1                           | GSyV-1  | Det-F       | CAAGCCATCCGTGCATCTGG            | 296bp         | 60°C                  | [66]       |
|                                                   |         | Det-R       | GCCGATTTGGAACCCGATGG            |               |                       |            |
| Grapevine rupestris vein feathering virus         | GRVfV   | GRVfV_6165F | ACTWCYATCCCTTCCAGT              | 445bp         | 60°C                  | This study |
|                                                   |         | GRVfV_6600R | GCTGACCATGCCACGAATCA            |               |                       |            |

**Supplementary Table S2.** Determination of the virome of each treatment in the experiment. Total number of reads mapping, percentage coverage and mean coverage on the different virus/viroid identified obtained by mapping using Geneious v11.1 with the Medium Low default parameter with 2 iterations (except for GFkV where 1 iteration was used). GenBank accession added for the sequences deposited. Total number of read mapped and sequenced are listed at the bottom with the calculation of the number of viral reads mapped per million reads sequenced. Virus acronyms: GRSPaV- grapevine rupestris stem pitting-associated virus; GRGV - grapevine red globe virus; GAMaV- grapevine asteroid mosaic-associated virus; GSyV-1 - grapevine Syrah virus 1; GFkV - grapevine fleck virus; GPGV - grapevine Pinot gris virus; GLRaV-1- grapevine leafroll-associated virus 1; GLRaV-3 - grapevine leafroll-associated virus 3; GRVfV - grapevine rupestris vein feathering virus; GVT - grapevine virus T; GVB - grapevine virus B.

|                  | HEALTHY      |            |               |           | GLD_S+       |            |               |           | GLD_S++      |            |               |           |
|------------------|--------------|------------|---------------|-----------|--------------|------------|---------------|-----------|--------------|------------|---------------|-----------|
|                  | reads mapped | % coverage | Mean Coverage | GenBank # | reads mapped | % coverage | Mean Coverage | GenBank # | reads mapped | % coverage | Mean Coverage | GenBank # |
| GRSPaV_I         | 228 868      | 100%       | 1 912         | ON221452  | 156 605      | 100%       | 1 330         | ON221454  | 275 809      | 100%       | 2 278         | ON221457  |
| GRSPaV_II        | 79 728       | 100%       | 671           | ON221450  | 116 761      | 96.8%      | 998           | ON221453  | 190 574      | 96.5%      | 1 619         | ON221456  |
| GRSPaV_III       | 223 636      | 99.7%      | 1 898         | ON221451  | 246 174      | 99.8%      | 2 100         | ON221455  | 348 787      | 100%       | 3 079         | ON221458  |
| GVT              |              |            |               |           |              |            |               |           | 66 455       | 100%       | 571           | ON221461  |
| GPGV             |              |            |               |           | 18 589       | 100.0%     | 189           | ON237610  |              |            |               |           |
| GVB #1           |              |            |               |           |              |            |               |           | 57 372       | 100%       | 569           | ON221459  |
| GVB #2           |              |            |               |           |              |            |               |           | 1 506 248    | 99.9%      | 14 868        | ON221460  |
| GLRaV-3          |              |            |               |           |              |            |               |           | 856          | 91.9%      | 3             |           |
| GLRaV-1          |              |            |               |           | 3 073        | 99.6%      | 12            | ON221467  | 1 430        | 94.2%      | 6             | ON221468  |
| GAMaV            | 10 327       | 87.8%      | 115           | ON583999  |              |            |               |           |              |            |               |           |
| GFkV             |              |            |               |           | 409 699      | 96.9%      | 4 146         | ON221466  |              |            |               |           |
| GRGV             | 340          | 75.7%      | 4             | ON221449  | 3 588        | 96.1%      | 38            | ON221462  | 40 353       | 100%       | 443           | ON221463  |
| GSyV-1           | 2 263        | 98.4%      | 26            |           |              |            |               |           |              |            |               |           |
| GRVfV            |              |            |               |           | 7 142        | 99.9%      | 80            | ON221464  | 12 496       | 100%       | 149           | ON221465  |
| HSVd             | 3 502        | 100%       | 836           |           | 3 019        | 100%       | 700           |           | 5 495        | 100%       | 1 274         |           |
| GYSVd            | 7 630        | 100%       | 1 427         |           | 6 971        | 100%       | 1 299         |           | 7 056        | 100%       | 1 312         |           |
| Total mapped     | 556 294      |            |               |           | 971 621      |            |               |           | 2 512 931    |            |               |           |
| Sequenced (M)    | 160.808      |            |               |           | 145.387      |            |               |           | 136.789      |            |               |           |
| Viral read per M | 3 459        |            |               |           | 6 683        |            |               |           | 18 371       |            |               |           |

## References

58. Osman, F.; Rowhani, A., Application of a spotting sample preparation technique for the detection of pathogens in woody plants by RT-PCR and real-time PCR (TaqMan). *Journal of Virological Methods* 2006, 133, (2), 130-136.
59. Beuve, M.; Moury, B.; Spilmont, A.-S.; Sempé-Ignatovic, L.; Hemmer, C.; Lemaire, O., Viral sanitary status of declining grapevine Syrah clones and genetic diversity of Grapevine Rupestris stem pitting-associated virus. *European Journal of Plant Pathology* 2013, 135, (2), 439-452.
60. Levy, L.; Lee, M.; Hadidi, A., Simple and rapid preparation of infected plant tissue extracts for PCR amplification of virus, viroid, and MLO nucleic acids. *Journal of Virological Methods* 1994, 49, (3), 295-304.
61. Saldarelli, P.; Giampetruzzi, A.; Morelli, M.; Malossini, U.; Pirolo, C.; Bianchedi, P.; Gualandri, V., Genetic variability of Grapevine Pinot gris virus and its association with grapevine leaf mottling and deformation. *Phytopathology* 2015, 105, (4), 555-563.
62. Terlizzi, F.; Li, C.; Ratti, C.; Qiu, W.; Credi, R.; Meng, B., Detection of multiple sequence variants of Grapevine rupestris stem pitting-associated virus using primers targeting the polymerase domain and partial genome sequencing of a novel variant. *Annals of Applied Biology* 2011, 159, (3), 478-490.
63. Beuve, M.; Candresse, T.; Tannières, M.; Lemaire, O., First report of grapevine redglobe virus (GRGV) in grapevine in France. *Plant Disease* 2015, 99, (3), 422-422.
64. Glasa, M.; Predajňa, L.; Komínek, P., Grapevine fleck virus isolates split into two distinct molecular groups. *Journal of Phytopathology* 2011, 159, (11-12), 805-807.
65. Xiao, H.; Meng, B., First report of Grapevine asteroid mosaic-associated virus and Grapevine rupestris vein feathering virus in Grapevines in Canada. *Plant Disease* 2016, 100, (10), 2175-2175.
66. Al Rwahnih, M.; Daubert, S.; Golino, D.; Rowhani, A., Deep sequencing analysis of RNAs from a grapevine showing Syrah decline symptoms reveals a multiple virus infection that includes a novel virus. *Virology* 2009, 387, (2), 395-401.
